# Supplementary material for: A new nanostructured γ-Li3PO4/GeO2 composite for all-solid-state Li-ion battery applications
Source: Royal Society of Chemistry journal article supplement (doi:10.1039/d4dt01423e), 2024-01-01
Supplement: d4dt01423e1.pdf [file d4dt01423e1.pdf]

## Supporting Information:

### A new nanostructured $\gamma$ -Li<sub>3</sub>PO<sub>4</sub>/GeO<sub>2</sub> composite for all-solid-state Li-ion battery applications

Hany El-Shinawi,<sup>a,b\*</sup> Edmund J. Cussen<sup>b</sup> and Serena A. Cussen<sup>b</sup>

<sup>a</sup> Department of Chemistry, Mansoura University, Mansoura, 35516, Egypt.

<sup>b</sup> Department of Materials Science and Engineering, University of Sheffield, Sir Robert Hadfield Building, Sheffield, S1 3JD, UK.

\* h\_elshinawi@mans.edu.eg

Table S1. The resistances, capacitances and ideality factors (alpha) calculated from the fit of the impedance data of  $\gamma$ -Li<sub>3</sub>PO<sub>4</sub>/GeO<sub>2</sub> at different temperatures (equivalent circuit [R1Q1][R2Q2]Q3).

| Temperature | R1 ( $\Omega$ )<br>Bulk resistance | R2 ( $\Omega$ )<br>Grain boundary<br>resistance | Q1 parameters<br>Capacitance and ( $\alpha$ ) | Q2 parameters<br>Capacitance and ( $\alpha$ ) |
|-------------|------------------------------------|-------------------------------------------------|-----------------------------------------------|-----------------------------------------------|
| 40°C        | 840 349                            | 946 943                                         | $5.0 \times 10^{-11}$ (1.00)                  | $3.5 \times 10^{-10}$ (0.94)                  |
| 60°C        | 173 463                            | 112 802                                         | $5.1 \times 10^{-11}$ (1.00)                  | $3.6 \times 10^{-9}$ (0.80)                   |
| 80°C        | 45 273                             | 29 702                                          | $6.3 \times 10^{-11}$ (1.00)                  | $1.7 \times 10^{-8}$ (0.67)                   |
| 100°C       | 17 352                             | 9 070                                           | $2.8 \times 10^{-10}$ (0.90)                  | $1.5 \times 10^{-8}$ (0.71)                   |

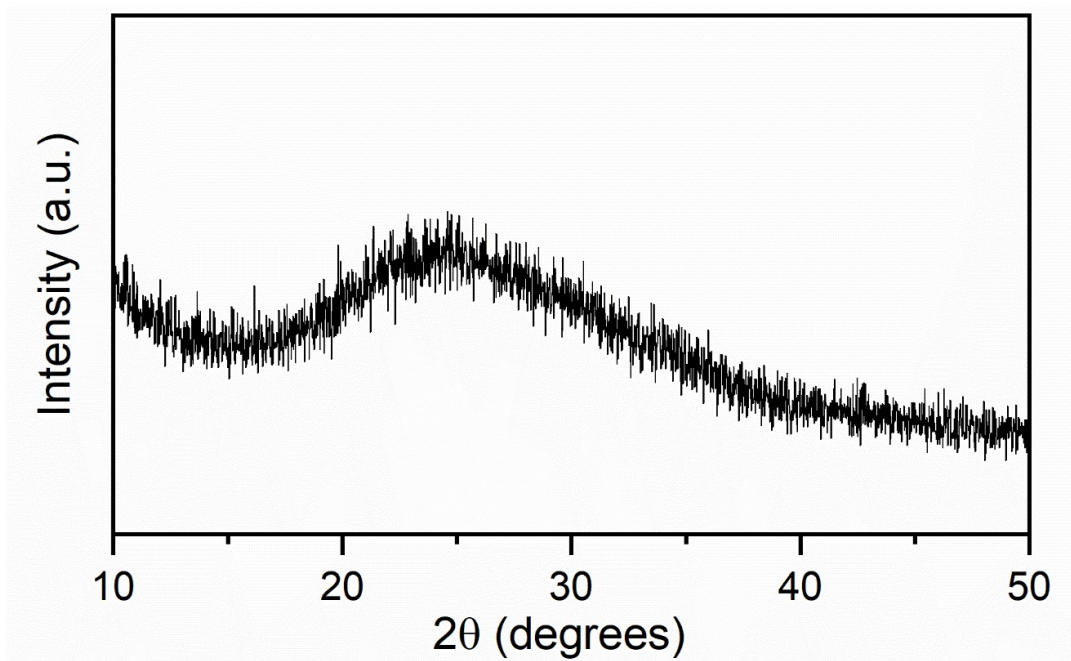

Figure S1. The XRD pattern of as-synthesized Li-P-Ge composite (microwave reaction; 260°C) with no further calcinations.

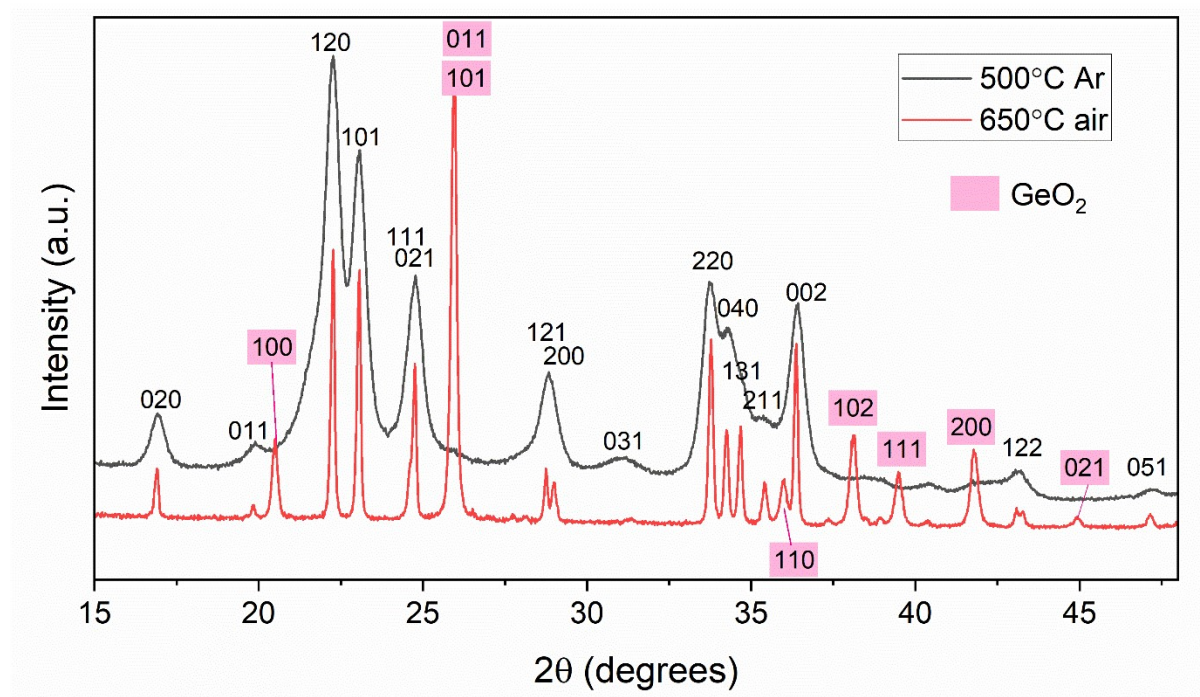

Figure S2. Indexed XRD data of  $\gamma$ -Li<sub>3</sub>PO<sub>4</sub>/GeO<sub>2</sub> samples calcined at 500°C in argon and at 650°C in air. Upon heating the material to 650°C, no peak shifts were observed but the crystallinity was highly improved which allowed an accurate analysis of the XRD data.

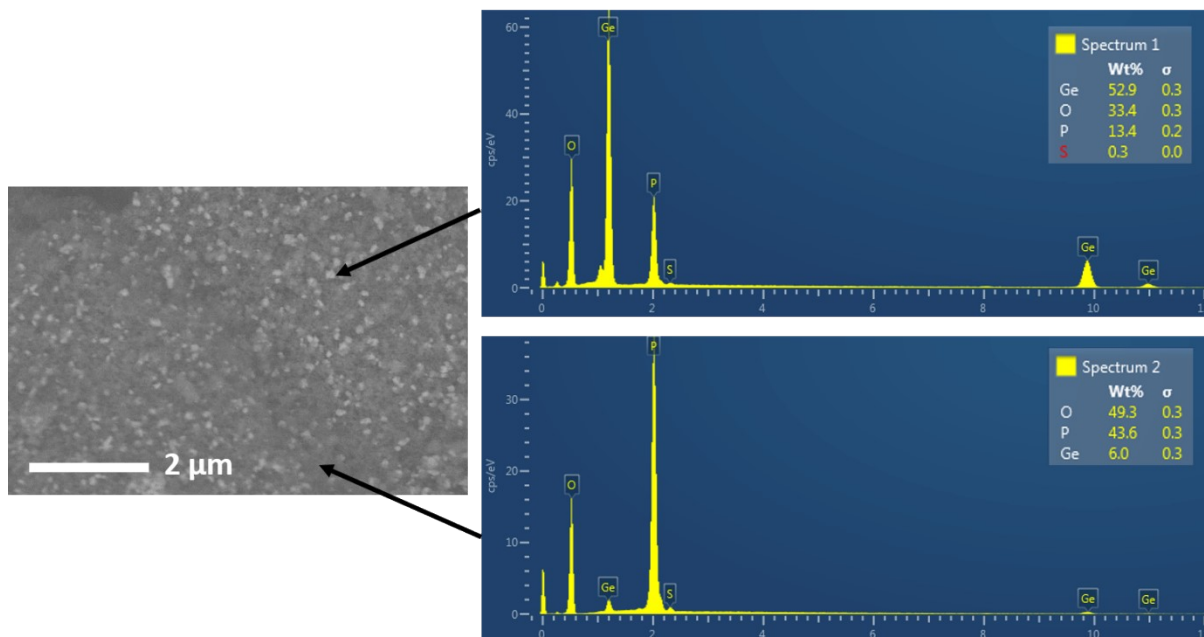

Figure S3. An EDX analysis of a sample of air-calcined  $\gamma$ - $\text{Li}_3\text{PO}_4/\text{GeO}_2$ .

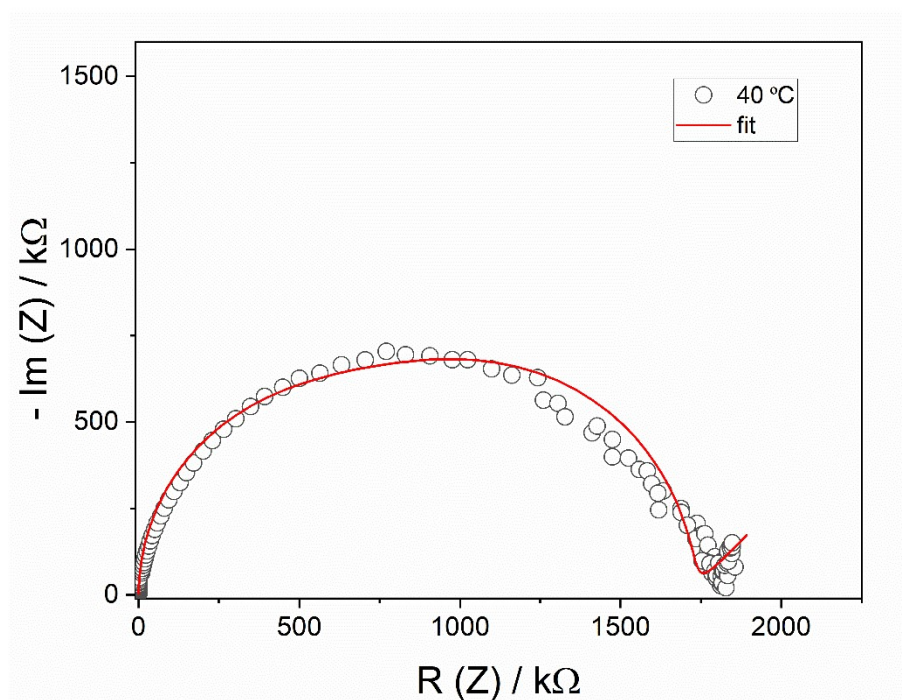

Figure S4. The impedance plot of argon-calcined  $\gamma$ - $\text{Li}_3\text{PO}_4/\text{GeO}_2$  at  $40^\circ\text{C}$ , fitted using the  $[\text{R1Q1}][\text{R2Q2}][\text{Q3}]$  equivalent circuit.

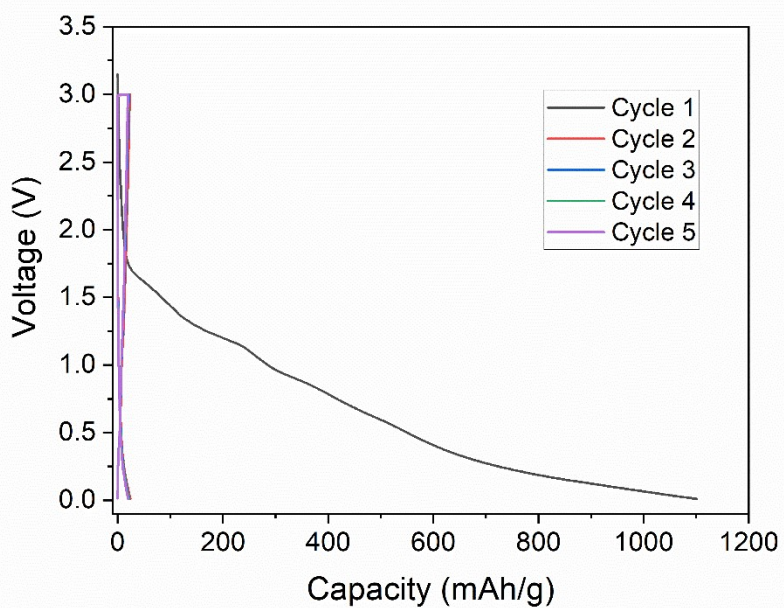

Figure S5. Charge/discharge curves (at 80 °C) for the first 5 cycles of the GeO<sub>2</sub>-C/Li<sub>3</sub>PS<sub>4</sub>/Li cell at a rate of 150 mAh/g (with respect to the germanium metal content). Commercial GeO<sub>2</sub> (Alfa Aesar; 99.99%) was mixed with carbon black (15 wt%) then employed in the three-layer cell by pressing the cell components at ~250 MPa.

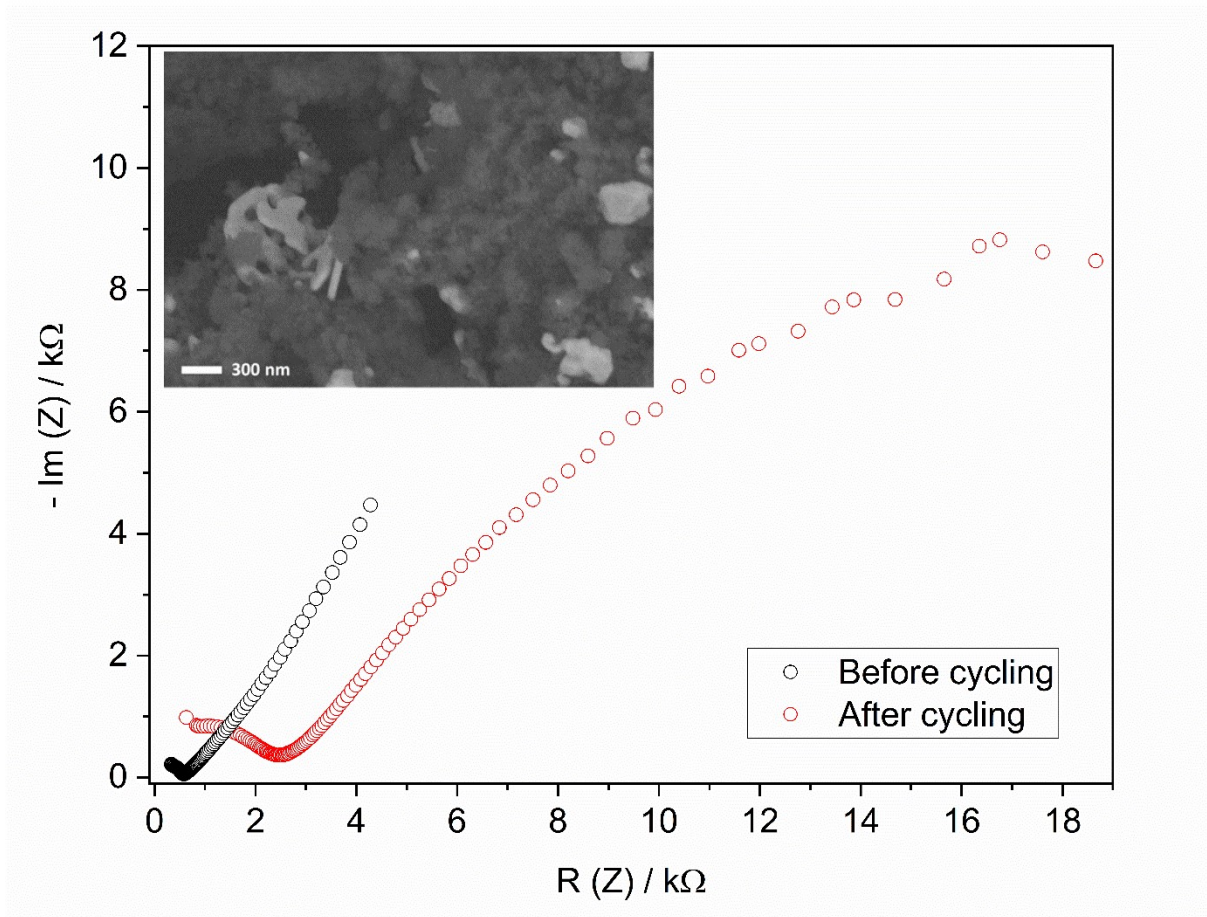

Figure S6. Typical impedance plots collected (at 80°C) from an  $\text{Li}_3\text{PO}_4\text{-GeO}_2\text{-C/Li}_3\text{PS}_4/\text{Li}$  solid-state cell before and after cycling. The inset is an SEM image collected from the  $\gamma\text{-Li}_3\text{PO}_4/\text{GeO}_2$  composite after cycling, showing Ge nanoparticles distributed in a matrix of nanostructured  $\gamma\text{-Li}_3\text{PO}_4/\text{C}$ .
